# Supplementary material
Source: publisher figshare collection journal article supplement (https://geolsoc.figshare.com/articles/dataset/_/3454931)

# RSA-01 Quartzite Cobble (*structural domain D*, Braid et al., 2010; *Alájar mélangé*; Eden, 1991)

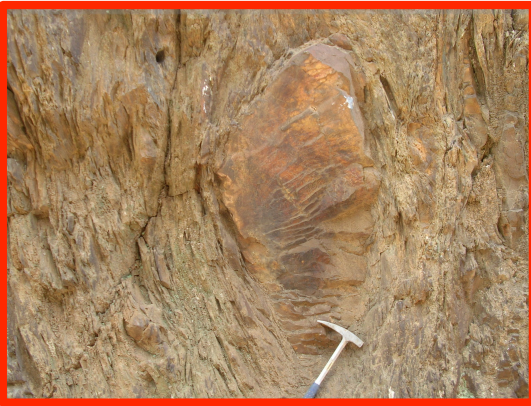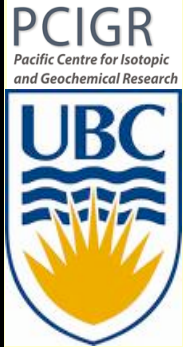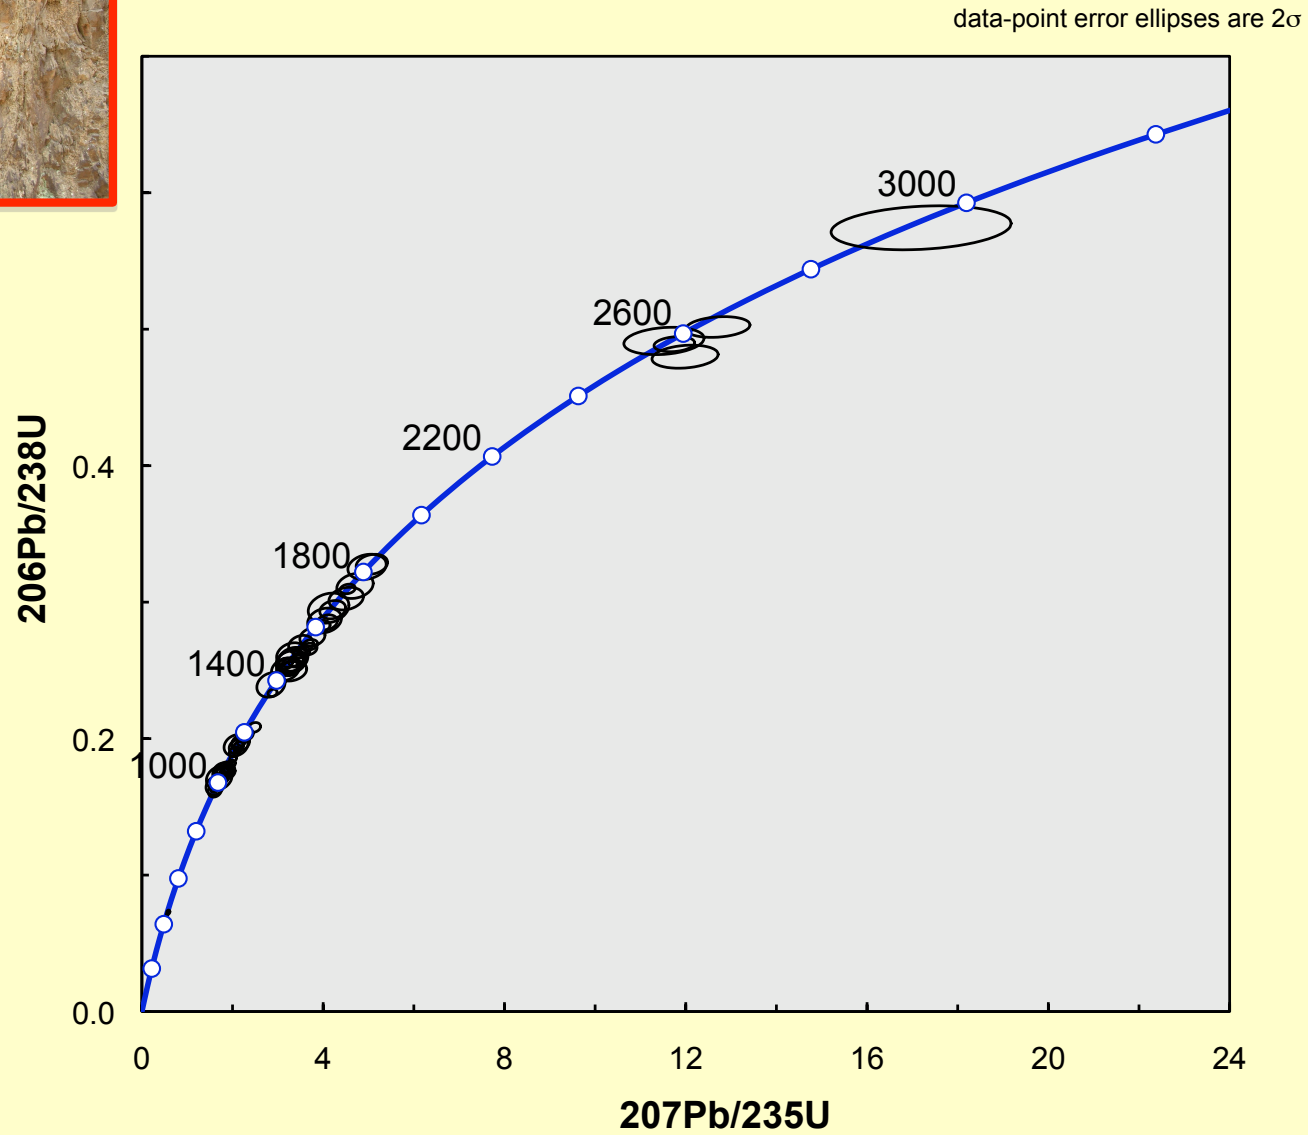

JB-43 Quartzite Cobble (*structural domain D*, Braid et al., 2010; *Alájar mélange*; Eden, 1991)

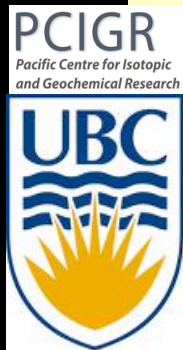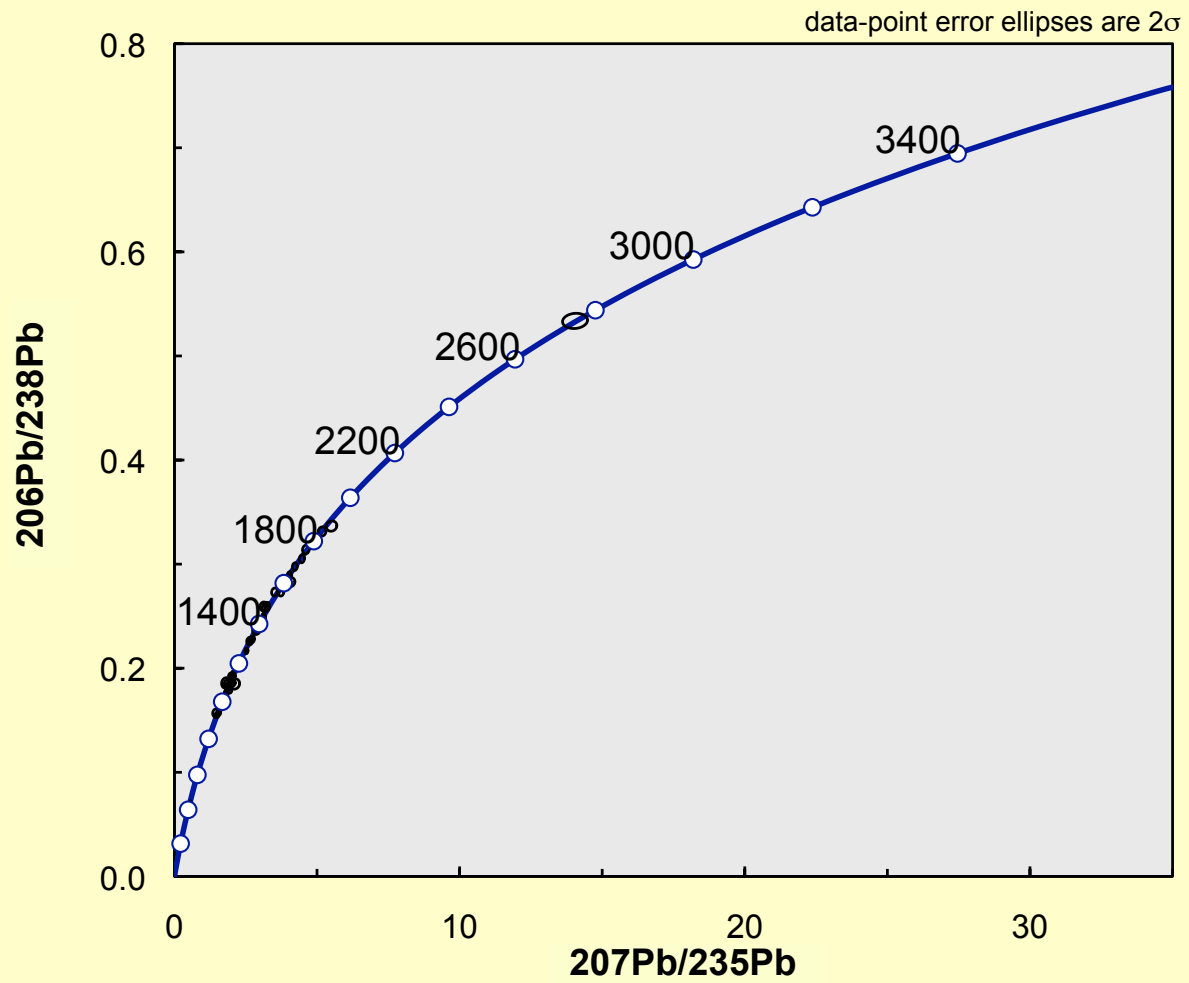

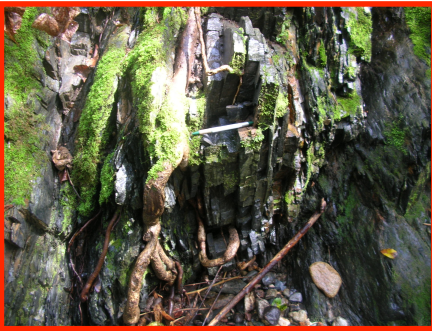

# RSA-02 Quartzite in matrix (*structural domain D*, Braid et al., 2009; *Alajar mélangé*; Eden, 1991)

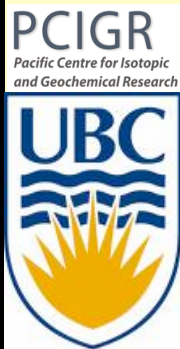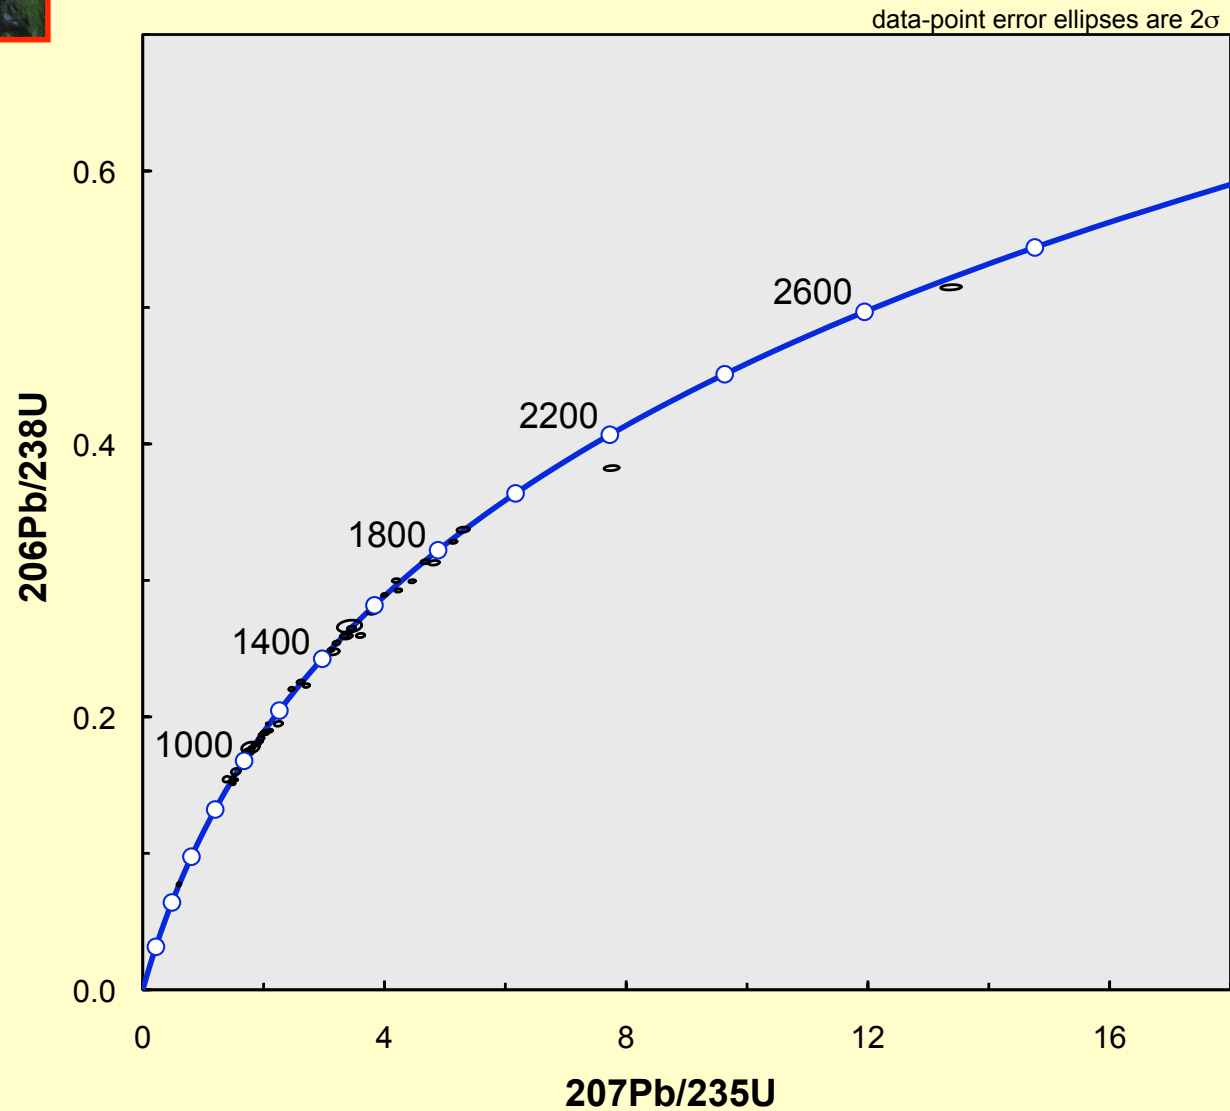

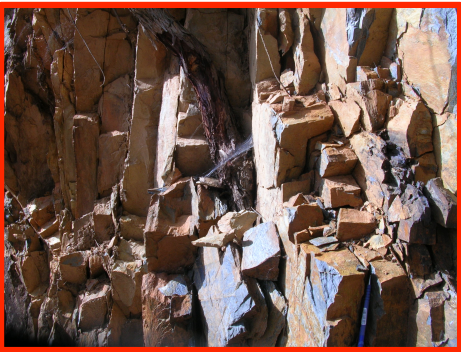

AC-03 Quartzite (*structural domain C*, Braid et al., 2009;  
*Ribeira de Limas Formation*; Apalategui et al., 1983)

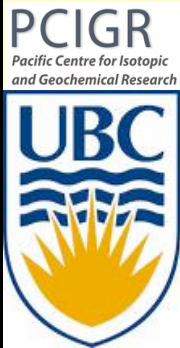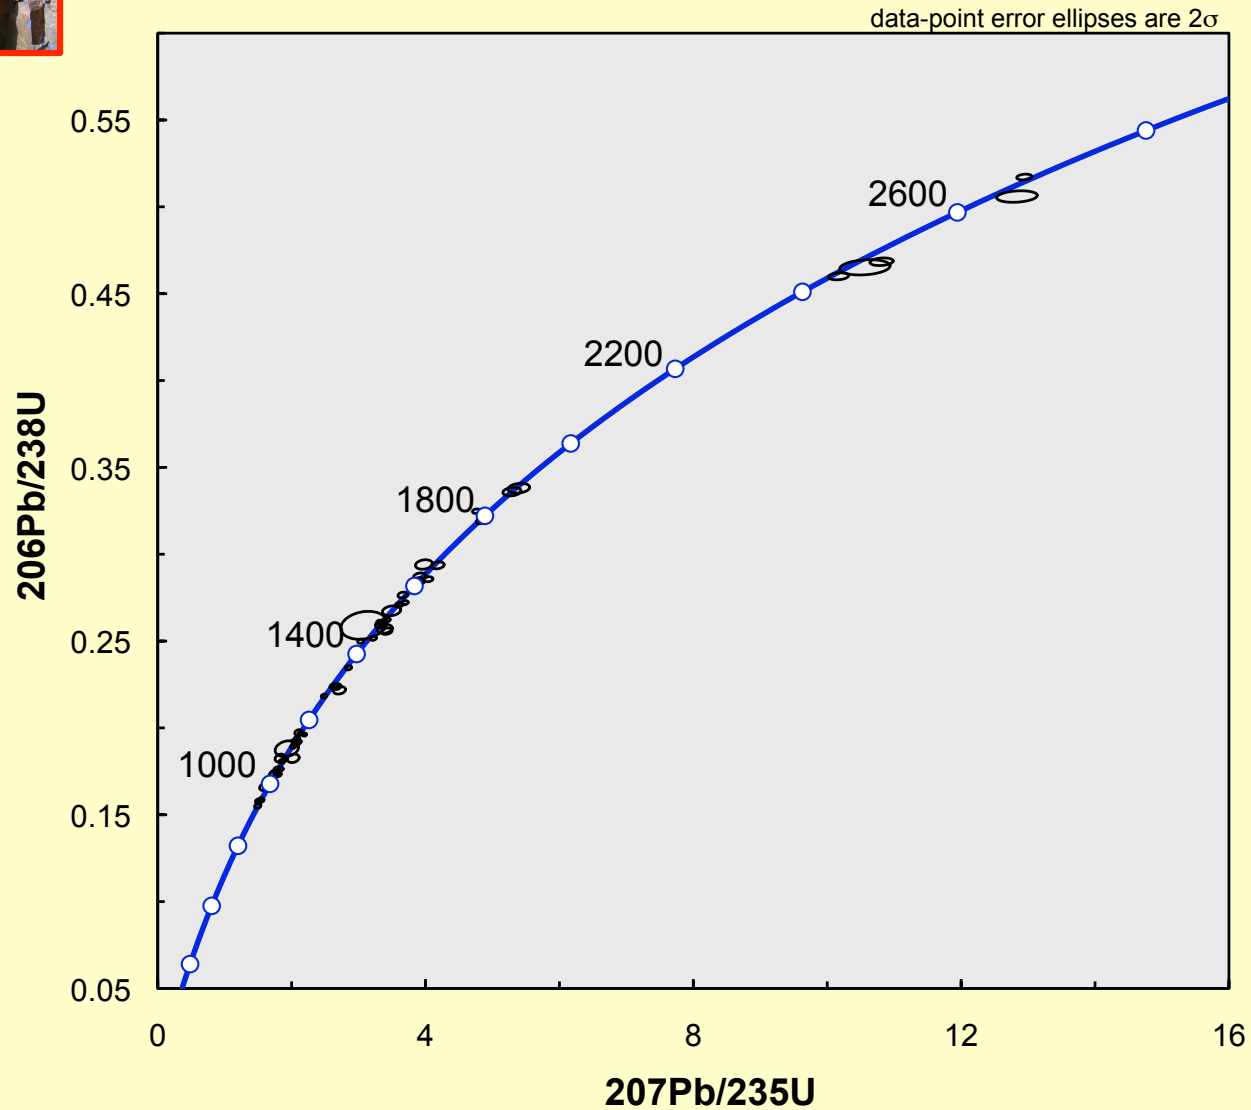

# JAB-08 ~ Santa Iria Flysch

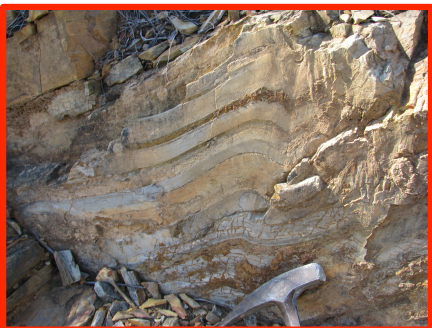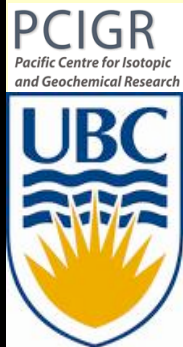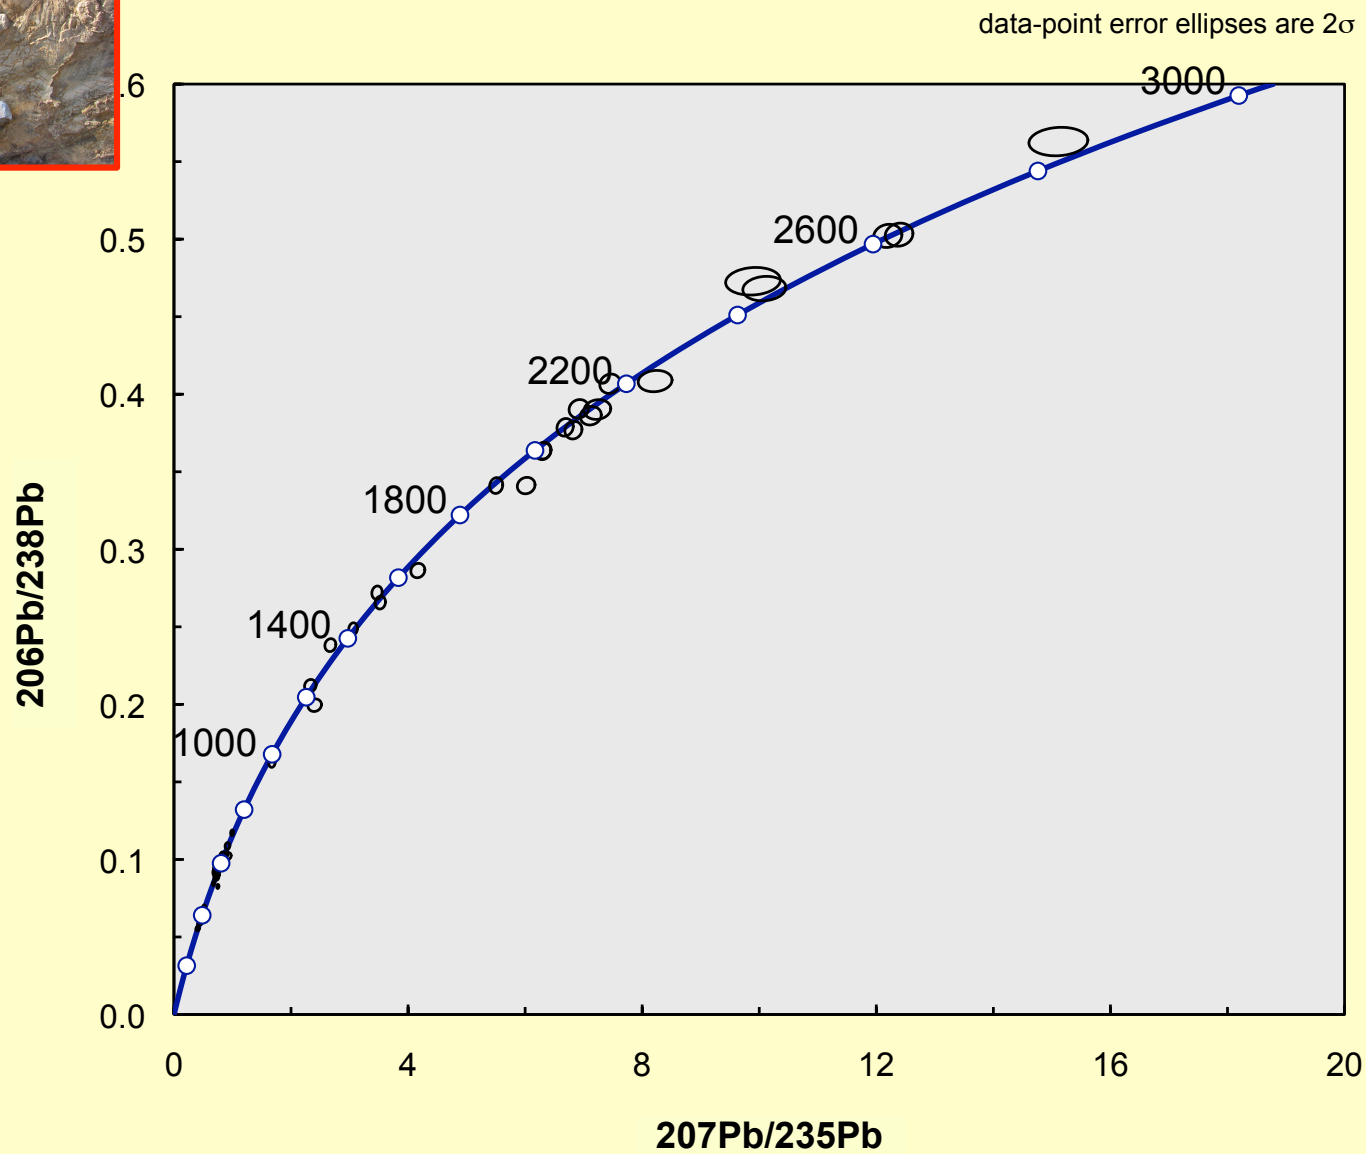

# JB-17 ~ Phyllite Quartzite Group (PQ)

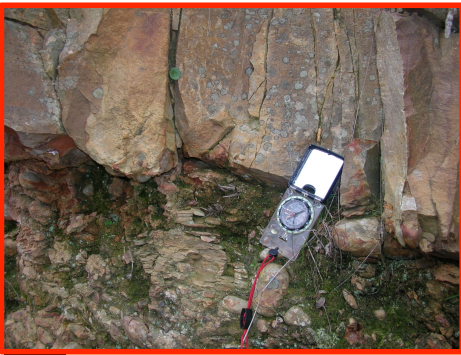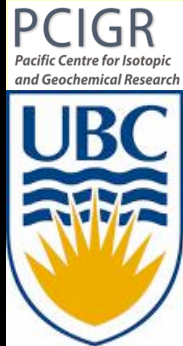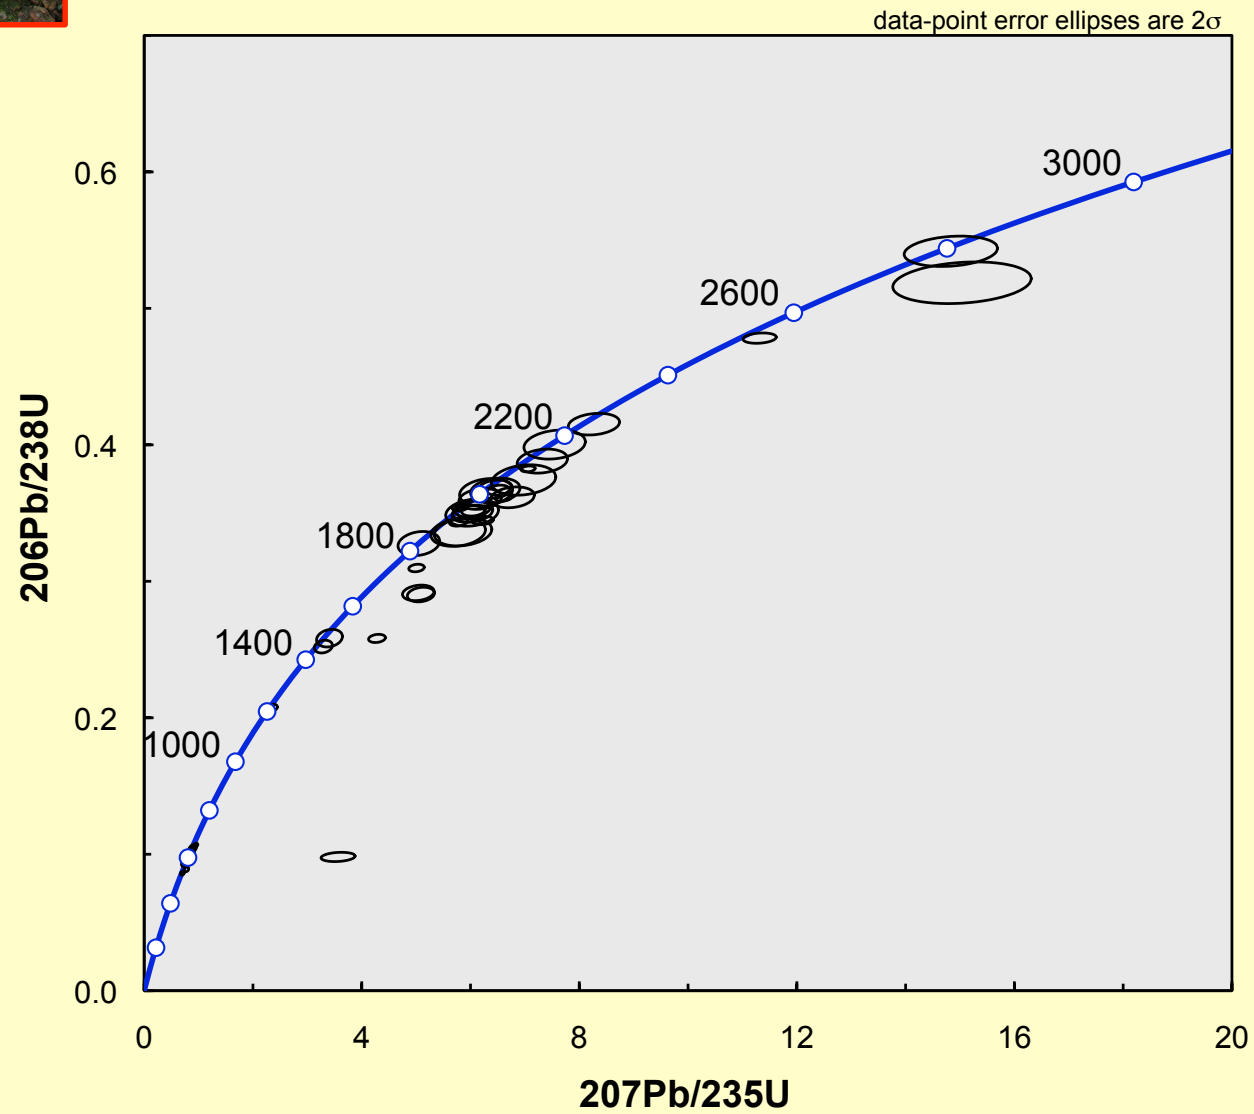

Supplement: Supplementary file 1 [file 1]
