# Supplementary material
Source: publisher figshare collection journal article supplement (https://geolsoc.figshare.com/articles/dataset/_/3454931)
Supplement: Supplementary file 2 [file 1]

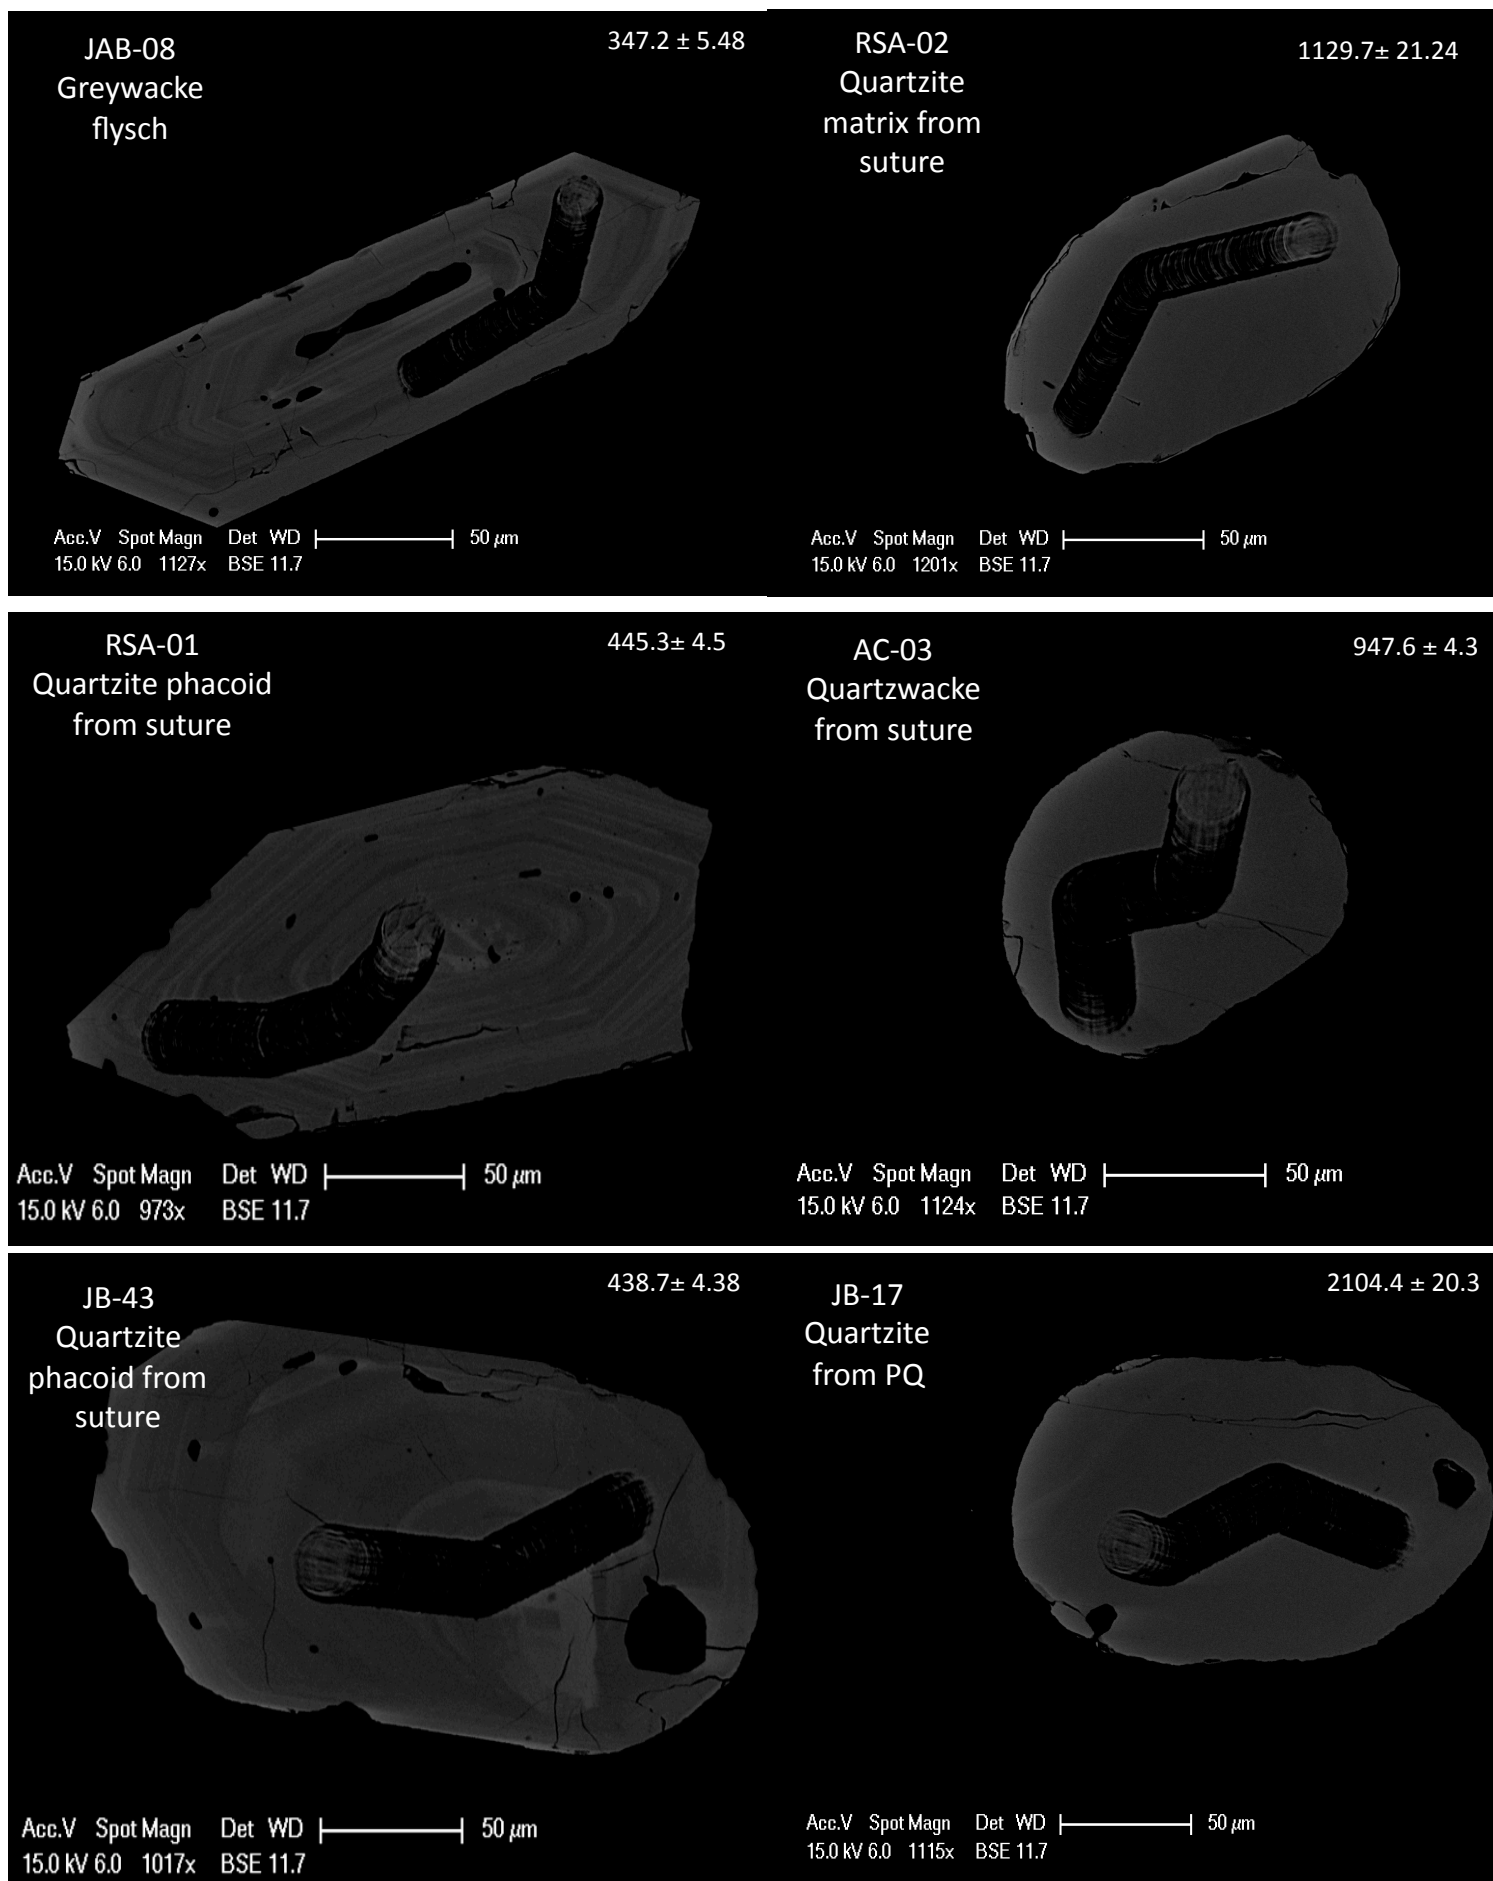

*Supplementary Figure 1.* Selected SEM backscatter images of representative detrital grains from the PDLZ and SPZ
